# Supplementary material
Source: publisher figshare collection journal article supplement (https://tandf.figshare.com/ndownloader/files/15683666)

**Supporting Information**

**Perimedine-linked rhodamine dye in visual sensing of Al3+, Fe3+ and Fe2+ ions in aqueous organic medium under different experimental conditions**

Subhendu Mondal and Kumaresh Ghosh*

*Department of Chemistry, University of Kalyani, Kalyani-741235, India.*

*Email:* [*ghosh_k2003@yahoo.co.in*](mailto:ghosh_k2003@yahoo.co.in)

*Fax: +913325828282; Tel: +913325828750 Extn: 305*

**Table S1:** Reported perimidine-based sensors for ion sensing

| **Entry** | **Structure of compounds** | **Selectivity** | **Medium** | **Ref.** |
| --- | --- | --- | --- | --- |
| 1 |  | Flurideion (F-) | DMSO | *Chem. Eur. J*. 2014, **20**, 17161 |
| 2 |  | Nitrite ion (NO2-) | DMSO | *Tetrahedron* 2015, **71**, 7782 |
| 3 |  | Fluride ion (F-) | CH3CN:H2O (3:2, v/v) | *Sensors and Actuators B* 2015, **207**, 878 |
| 4 |  | Cupric ion (Cu2+) | Aqueous acetonitrile | *RSC Adv*., 2017, **7**, 40563 |
| 5 |  | Cupric ion (Cu2+) | H2O:DMSO (99:1) | *Supramol. Chem.* 2018, **30**, 218 |
| 6 |  | Cupric ion (Cu2+) | CH3CN/H2O (9:1, v/v) | *RSC Adv*., 2017, **7**, 40563. |
| 7. |  | Al3+ and Fe3+ | CH3CN/H2O (3:1, v/v) | *Present Work* |

**Fig. S1.** (a) Fluorescence intensity of **1** at different pHs in CH3CN/aqueous Tris-HCl buffer (3:1, v/v) and (b) variation of fluorescence intensity with pH (λexc = 350 nm).

**Fig. S2.** Absorption titration spectra of **1** ( c = 2.5 x 10-5 M ) upon addition of 12 equiv. amounts of (a) Cu2+, (b) Fe2+, (c) Ag+, (d) Cd2+, (e) Co2+, (f) Hg2+, (g) Mg2+, (h) Ni2+, (i) Pb2+, (j) Zn2+, (k) Cr3+, (l) Ru3+ and (m) Eu3+ (in all cases [cation] = 1 x 10-3 M ) in CH3CN/water (3:1, v/v; 10 mM Tris-HCl buffer; pH = 6.90).

**Fig. S3.** Change in emission of **1** (c = 2.5 x 10-5 M ) upon addition of 12 equiv. amounts of different cation ([cation] = 1 x 10-3 M ) in CH3CN/water (3:1, v/v; 10 mM HEPES buffer; pH = 6.90) [λex = 510 nm].

**Fig. S4.** Benesi- Hilderband plots for compound **1** with (a) Al3+ and (b) Fe3+ ions in CH3CN/H2O (3:1, v/v; 10 mM Tris-HCl buffer; pH = 6.90).

**Fig. S5.**  Detection Limits for compound **1** with (a) Al3+ and (b) Fe3+ in CH3CN/H2O (3:1, v/v; 10 mM Tris-HCl buffer; pH = 6.90).


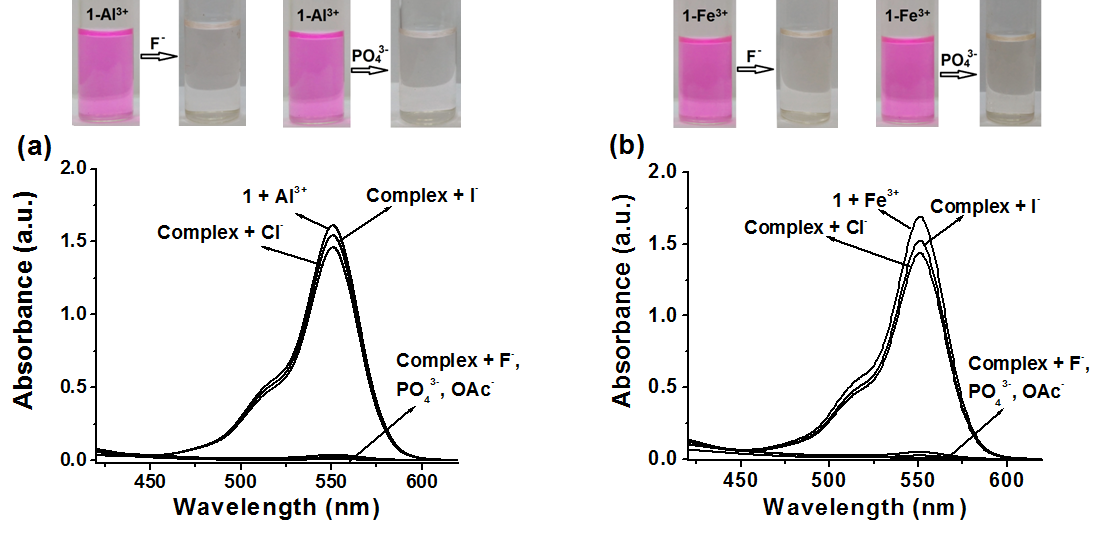


**Fig. S6.**  Change in absorbance of (a) **1**-Al3+ complex and (b) **1**-Fe3+ complex upon addition of TBAF and sodium phosphate in CH3CN/H2O (3:1, v/v; 10 mM Tris-HCl buffer; pH = 6.90) [Inset: change in color of **1**-Al3+/**1**-Fe3+ complex with addition of F-/PO43-].

**Fig. S7**. Suggestive mode of interaction of **1** with Cu2+ in aq. CH3CN.

**Table S2**: Reported Rhodamine-based structures for Al3+ and Fe3+ ion sensing.

| **Entry** | **Structure of compounds** | **Selectivity** | **Medium** | **Detection limit (M)** | **Ref.** |
| --- | --- | --- | --- | --- | --- |
| 1 |  | Al3+ and Pb2+ ion | Ethanol/HEPES solution (1/5, pH 7.4) | 1.05 x 10-8  M for Al3+ | *Sensors and Actuators B,* **2018**, *254*, 1094. |
| 2 |  | Al3+ and Fe3+ ion | CH3OH/H2O (9:1, v/v, pH 7.0, 10 mM Tris) | 3.9 x 10-6 M for Al3+ and 4.3 x 10-6 M for Fe3+ | *Sensors and Actuators B,* **2015***, 213*, 181. |
| 3 |  | Al3+  ion | CH3CN:DMSO  (1:4, v/v) | 8.5 × 10-9 M | *Sens. Actuators, B* ***2016****, 228, 259.* |
| 4 |  | Al3+  ion | CH3CN/H2O (4/1, v/v; 10 μM tris HCl buffer; pH 7.0). | 8.57 x 10-7 M | *Inorg. Chem*., **2017**, *56*, 8889. |
| 5 |  | Al3+  ion | CH3CN–H2O (4 : 1, v/v, 10 mM Tris–HCl buffer, pH 7.0) | 2.94 x 10-5 M | . *RSC Adv*., **2014**, *4*, 23428. |
| 6 |  | Al3+  ion | CH3CN | 2.86 × 10-8 M | *Sens. Actuators B,* ***2015****, 208, 75.* |
| 7 |  | Al3+  ion | Ethanol- H2O (1:1, v/v,  100 μM HEPES buffer, pH 7.2) | 1.96 × 10-7 M | *J. Bioorg. Med. Chem.,* **2015**, 23, 694. |
| 8 |  | Al3+  ion | Ethanol-H2O (1:3, v/v, pH 7.4) | 6.03 × 10-8 M | *Dalton Trans*. **2015**, *44*, 8708. |
| 9 |  | Al3+ and Hg2+ ion | CH3CN/H2O (3:1, v/v; 10 mM HEPES buffer ; pH = 6.85) | 1.9 x 10-7 Mfor Al3+ ion and 1.26 x 10-7 M ion for Hg2+ ion | *Supramol. Chem.* **2019**, *31*, 1. |
| 10 |  | Al3+  ion | Ethanol-H2O (9 : 1, v : v, 20 mM HEPES buffer, pH = 5.8) | 1.6 x 10-7 M | *RSC Adv.,* **2018**, *8*, 31106 |
| 11 |  | Al3+  ion | Ethanol– H2O (1 : 9, v/v, Tris–HCl buffer, pH = 7.2) | 1.84 x 10-6 M | *RSC Adv.,* **2019***, 9,* 6027 |
| 12 |  | Al3+ and Cu2+ ion | CH3CN-H2O (7:3, v/v, HEPES Buffer, p H= 7.3) | 5.72 x 10-7 Mfor Al3+ ion and 3.21 x 10-7 M ion for Hg2+ ion | *Sens. Actuators B,* ***2018****, 266*, 95*.* |
| 13 |  | Al3+  ion | EtOH-H2O (4:1, v/v, 20 M HEPES buffer, pH = 7.2) | 1.1 x 10-7 M | *New J. Chem.,* **2018***, 42,* 10191. |
| 14 |  | Al3+ and Zn2+ ion | MeOH-H2O (9:1, v/v, 10 mM HEPES buffer, pH = 7.4) | 1.09 x 10-8 M for Al3+ ion and 7.69 x 10-8 M for Zn2+ ion | *ACS Omega,* **2019***, 4,* 6864. |
| 15 |  | Al3+ and Hg2+ ion | CH3CN-H2O (9:1, v/v) | 7.18 x 10-8 M for Al3+ ion and 4.8 x 10-7 m for Hg2+ ion | *Sensors and Actuators B,* **2019***, 290,* 558. |
| 16 |  | Fe3+  ion | CH3CN/H2O (1:1, v/v; 20 mM HEPES buffer ; pH = 6.95) | 3.2 x 10-7 M | *Dalton Trans*., **2014**, 43, 5983 |
| 17 |  | Fe3+  ion | EtOH/ water (9:1, v/v) containing HEPES buffer (10 mM, pH =7.2). | 7.68× 10-7 M | *J. Photochem. Photobiol. A*, **2017**, *332*, 351. |
| 18 |  | Fe3+  ion | MeCN/H2O (30%, pH, 7.4, Tris- HCl buffer, 1 mM) | 1.16 x 10-8 M | J. *Sens. Actuators, B*, **2017**, *242*, 921 |
| 19 |  | Fe3+  ion | CH3CN–H2O (1/1, v/v) | 7.2 × 10−8 M | *Sens. Actuators B*, **2014**, *192*, 439. |
| 20 |  | Fe3+  ion | Ethanol–water solutions (9:1, v/v, Tris–HCl, pH = 7.4) | 4.05 10-6 M | *Tetrahedron Lett*., **2015**, *56*, 5024; |
| 21 |  | Fe3+  ion | HEPES buffer at pH 7.2 | 0.17 m M | *New J. Chem***.**, **2018**,42, 3435 |
| 22 |  | Fe3+  ion and Hg2+ ion | EtOH/PBS buffer (1:1, v/v, pH = 7.4) | 2.72 x 10-6 M | Dyes and Pigments, **2017**, 136, 782 |
| 23 |  | Fe3+  ion | MeOH-H2O (1:1, v/v) | 1.28 x 10-8 M | Spectrochimica Acta, **2019**, *213*, 167. |
| 24 |  | Fe3+  ion | EtOH/H2O (2:1, v/v, HEPES buffer, 0.6 mM, pH = 7.20) | 2.05 x 10-7 M | Tetrahedron, **2019**, *75*, 1223. |
| 25 |  | Fe3+  ion | EtOH/H2O (1:1, v/v, pH = 7.0) | 2.81 x 10-8 M | *Spectrochimica Acta*, **2018**, *191*, 566. |
| 26 |  | Fe3+ and Cu2+  ion | Aqueous medium | 3.3 x 10-8 M for Al3+ ion and  1.8 × 10−8 M for Cu+ ion | *Sens. Actuators, B*, **2018**, *274*, 22. |
| 26 |  | Fe3+  ion | CH3CN/H2O (20:1, v/v) | 2.09 x 10−6 M. | *Spectrochimica Acta*, **2018**, *194*, 226. |
| 27 |  | Al3+ and Fe3+  ion | CH3CN/H2O solution (3:1, v/v; 10 mM Tris-HCl buffer ; pH = 6.90) | 6.24 x 10-8  M for Al3+ and 5.30 x 10-8 M for Fe3+ | Present Work |

**1H NMR (CDCl3, 400 MHz) of 1**


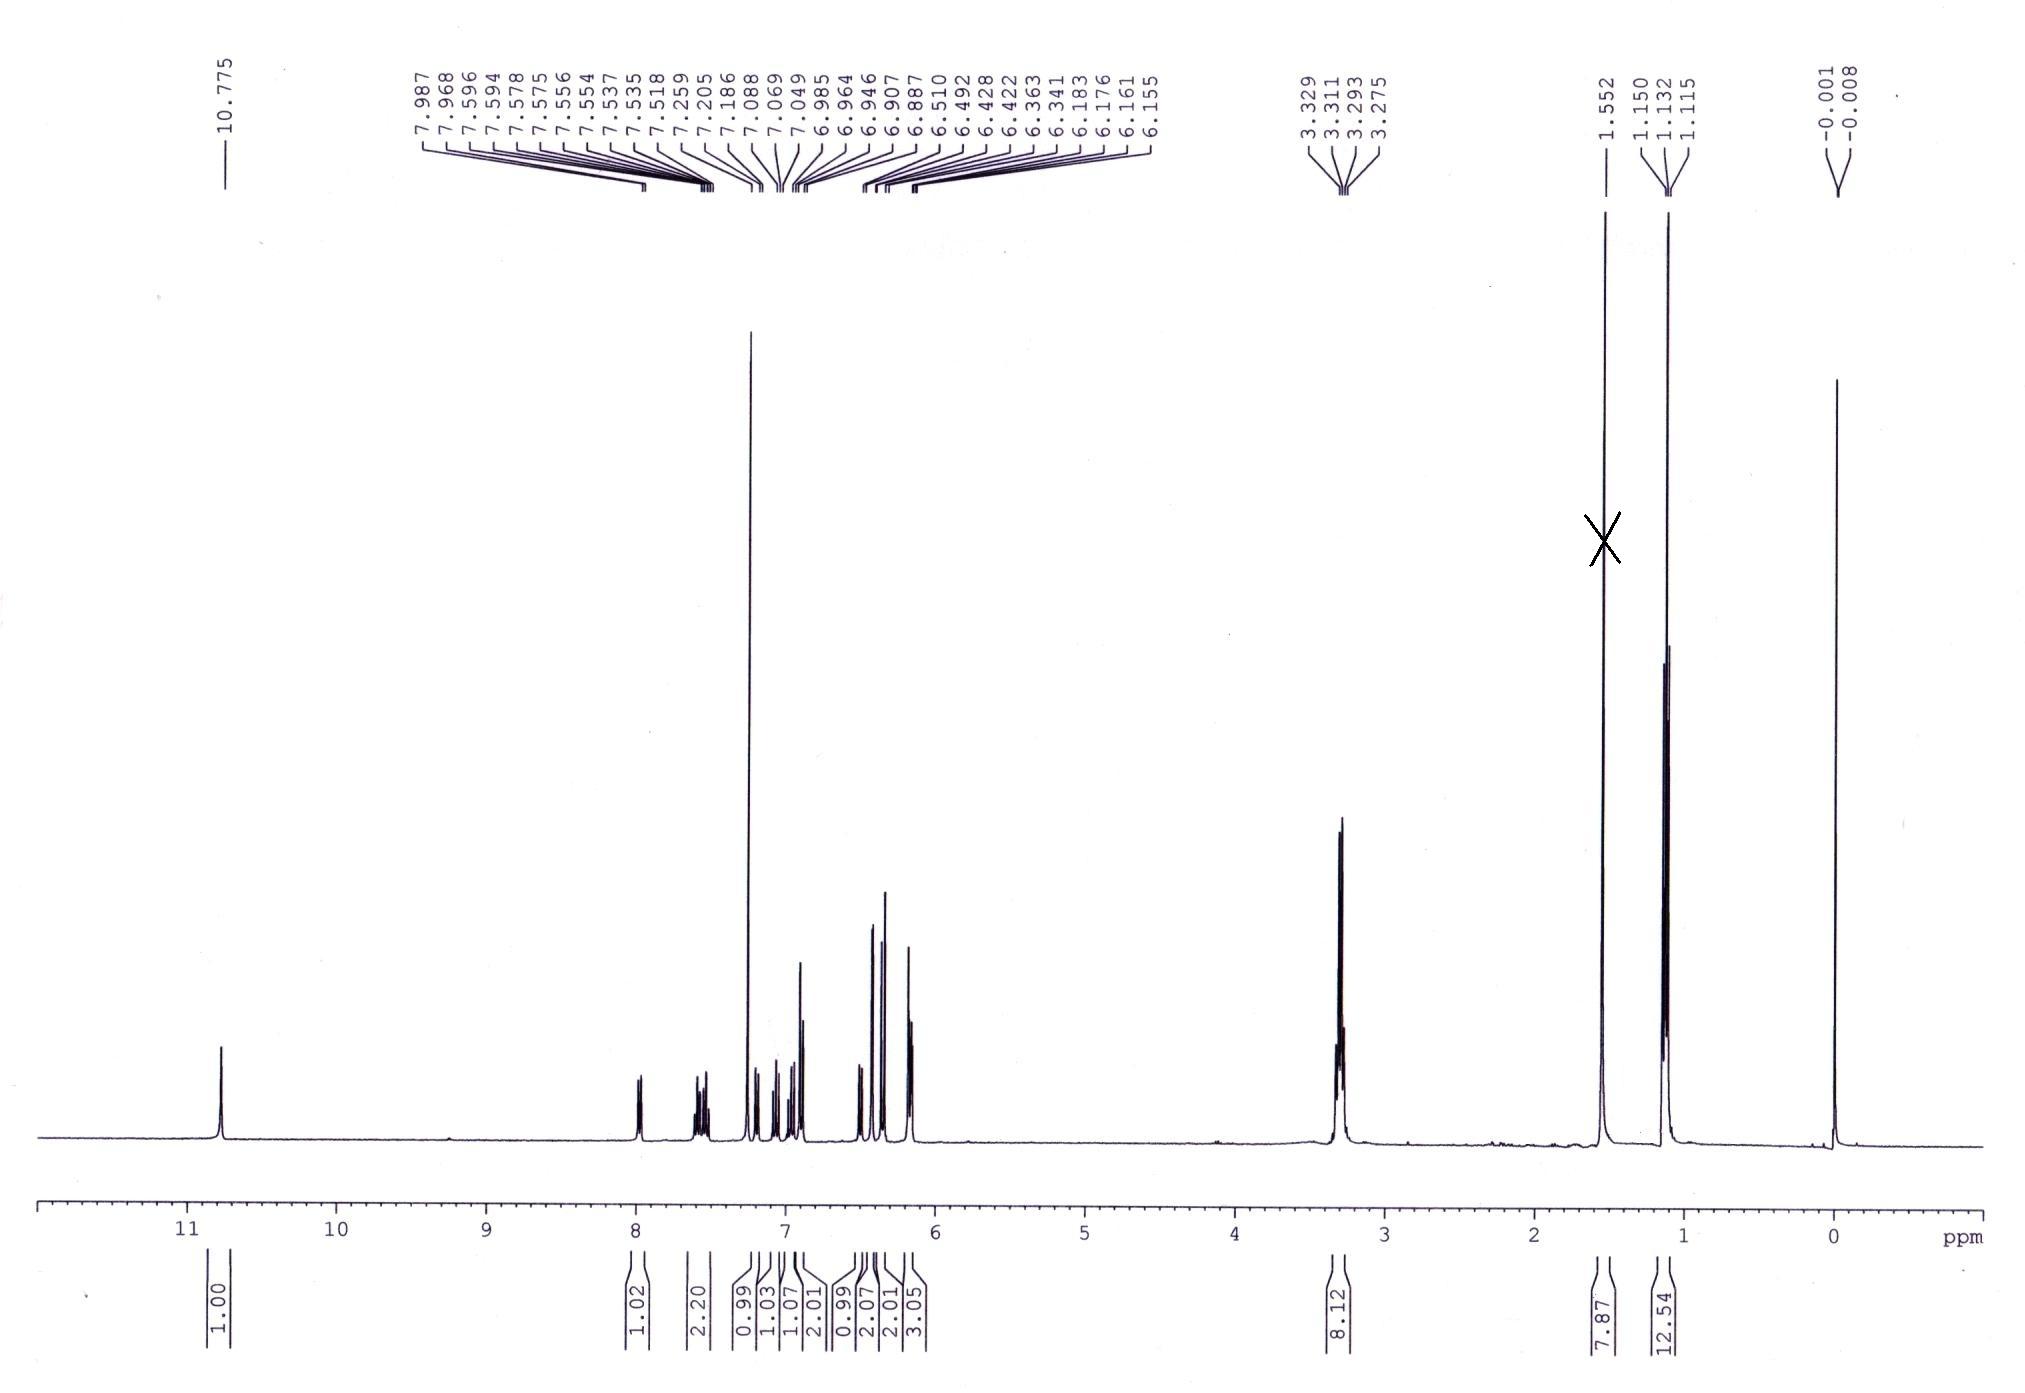


**13C NMR (CDCl3, 100 MHz) of 1**


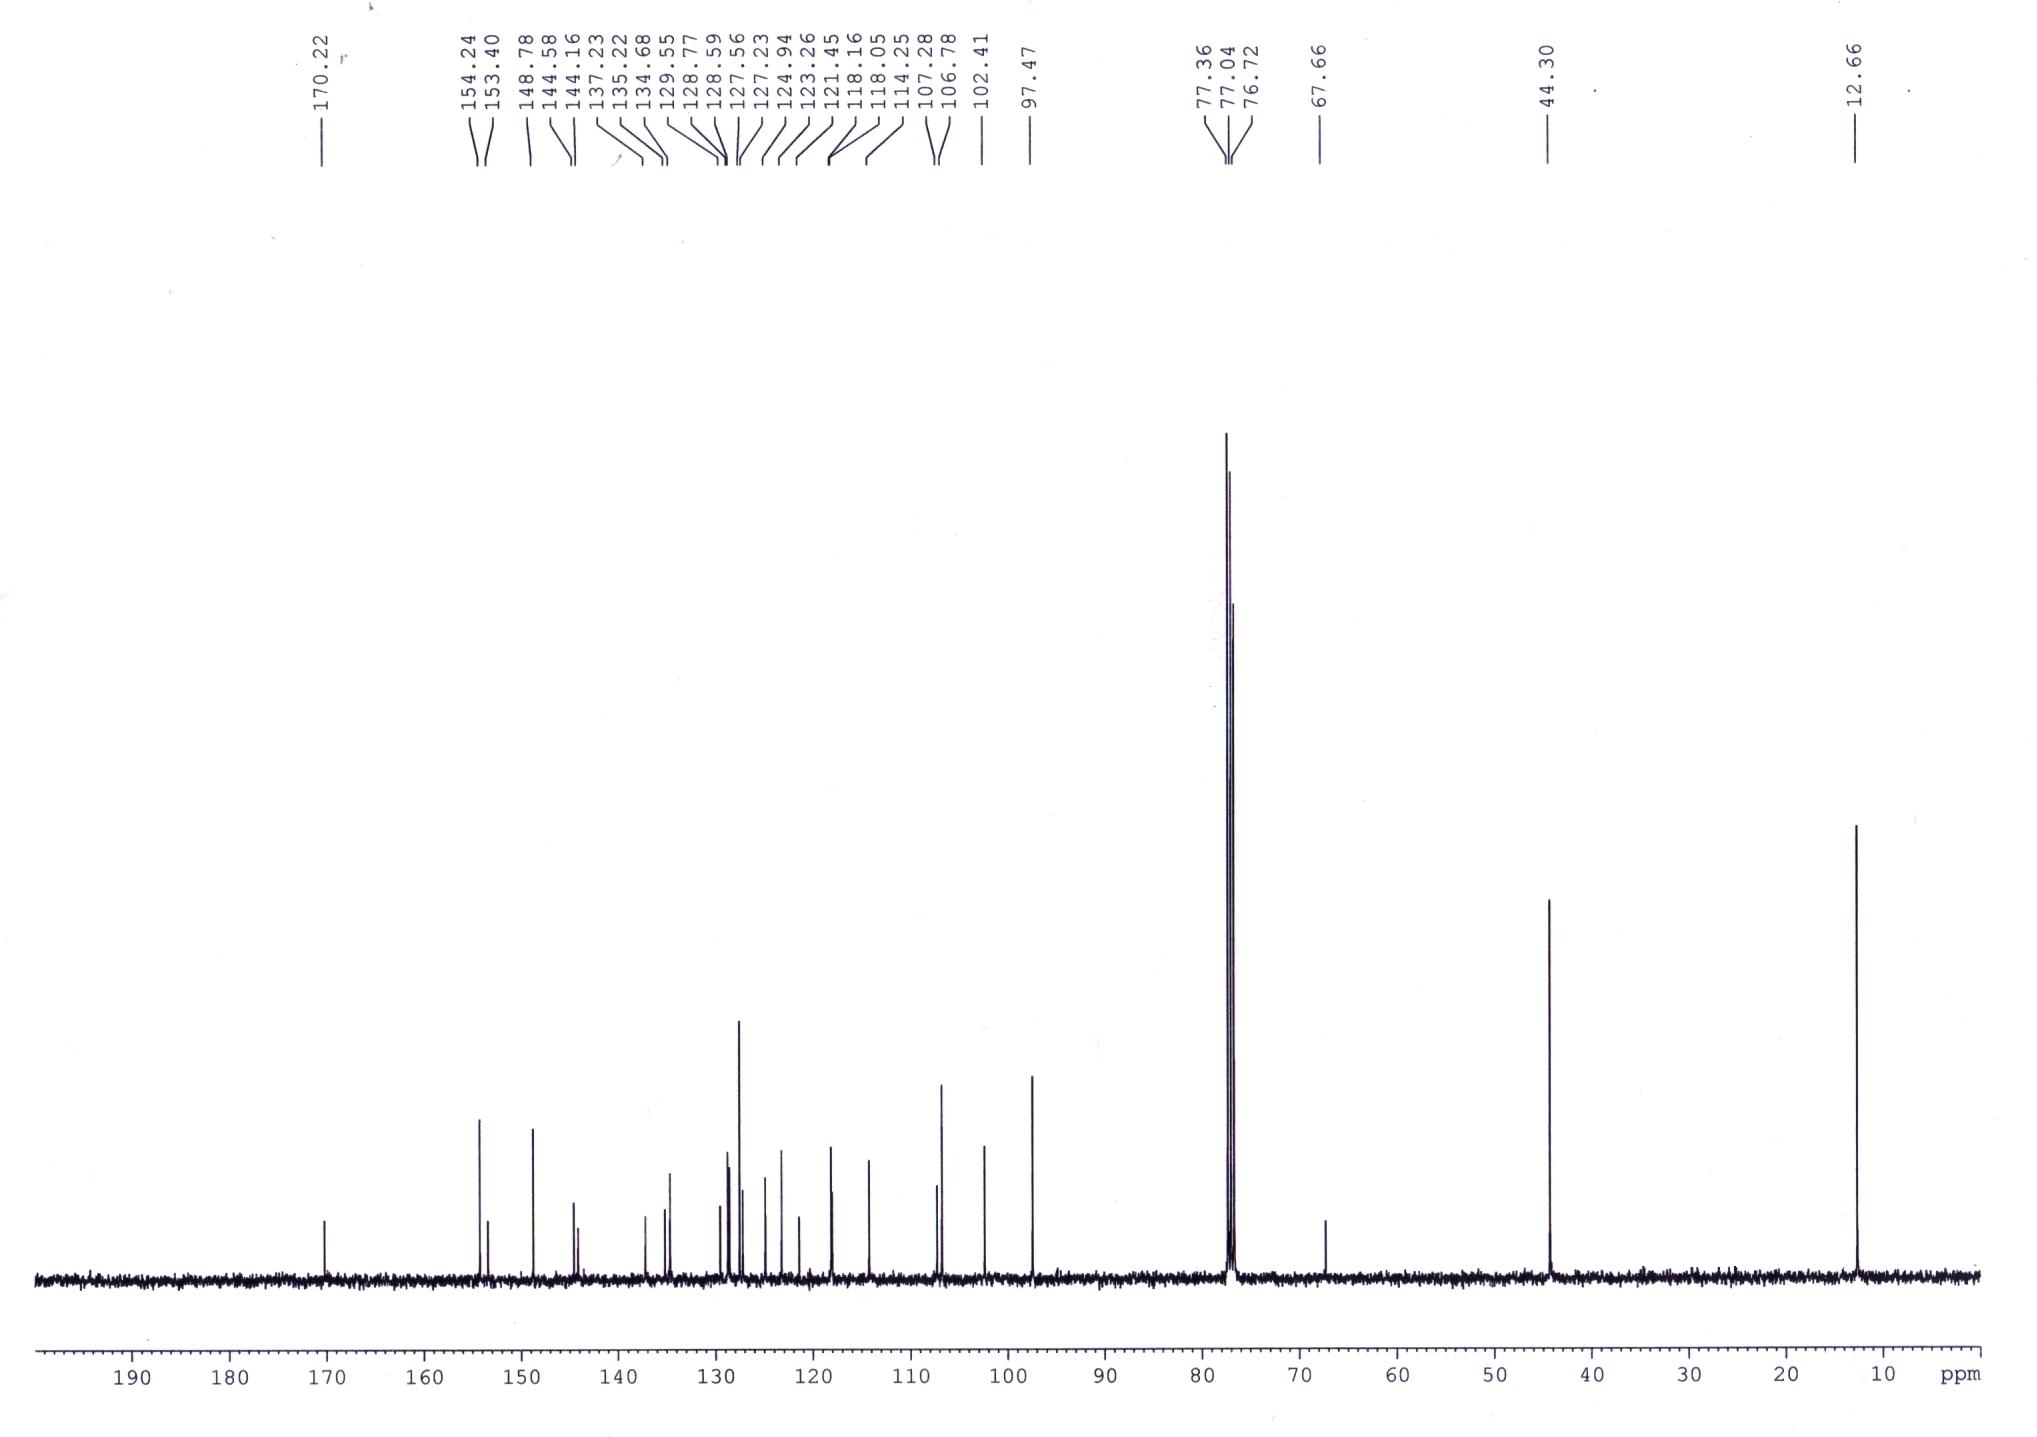


**HRMS spectra of 1**


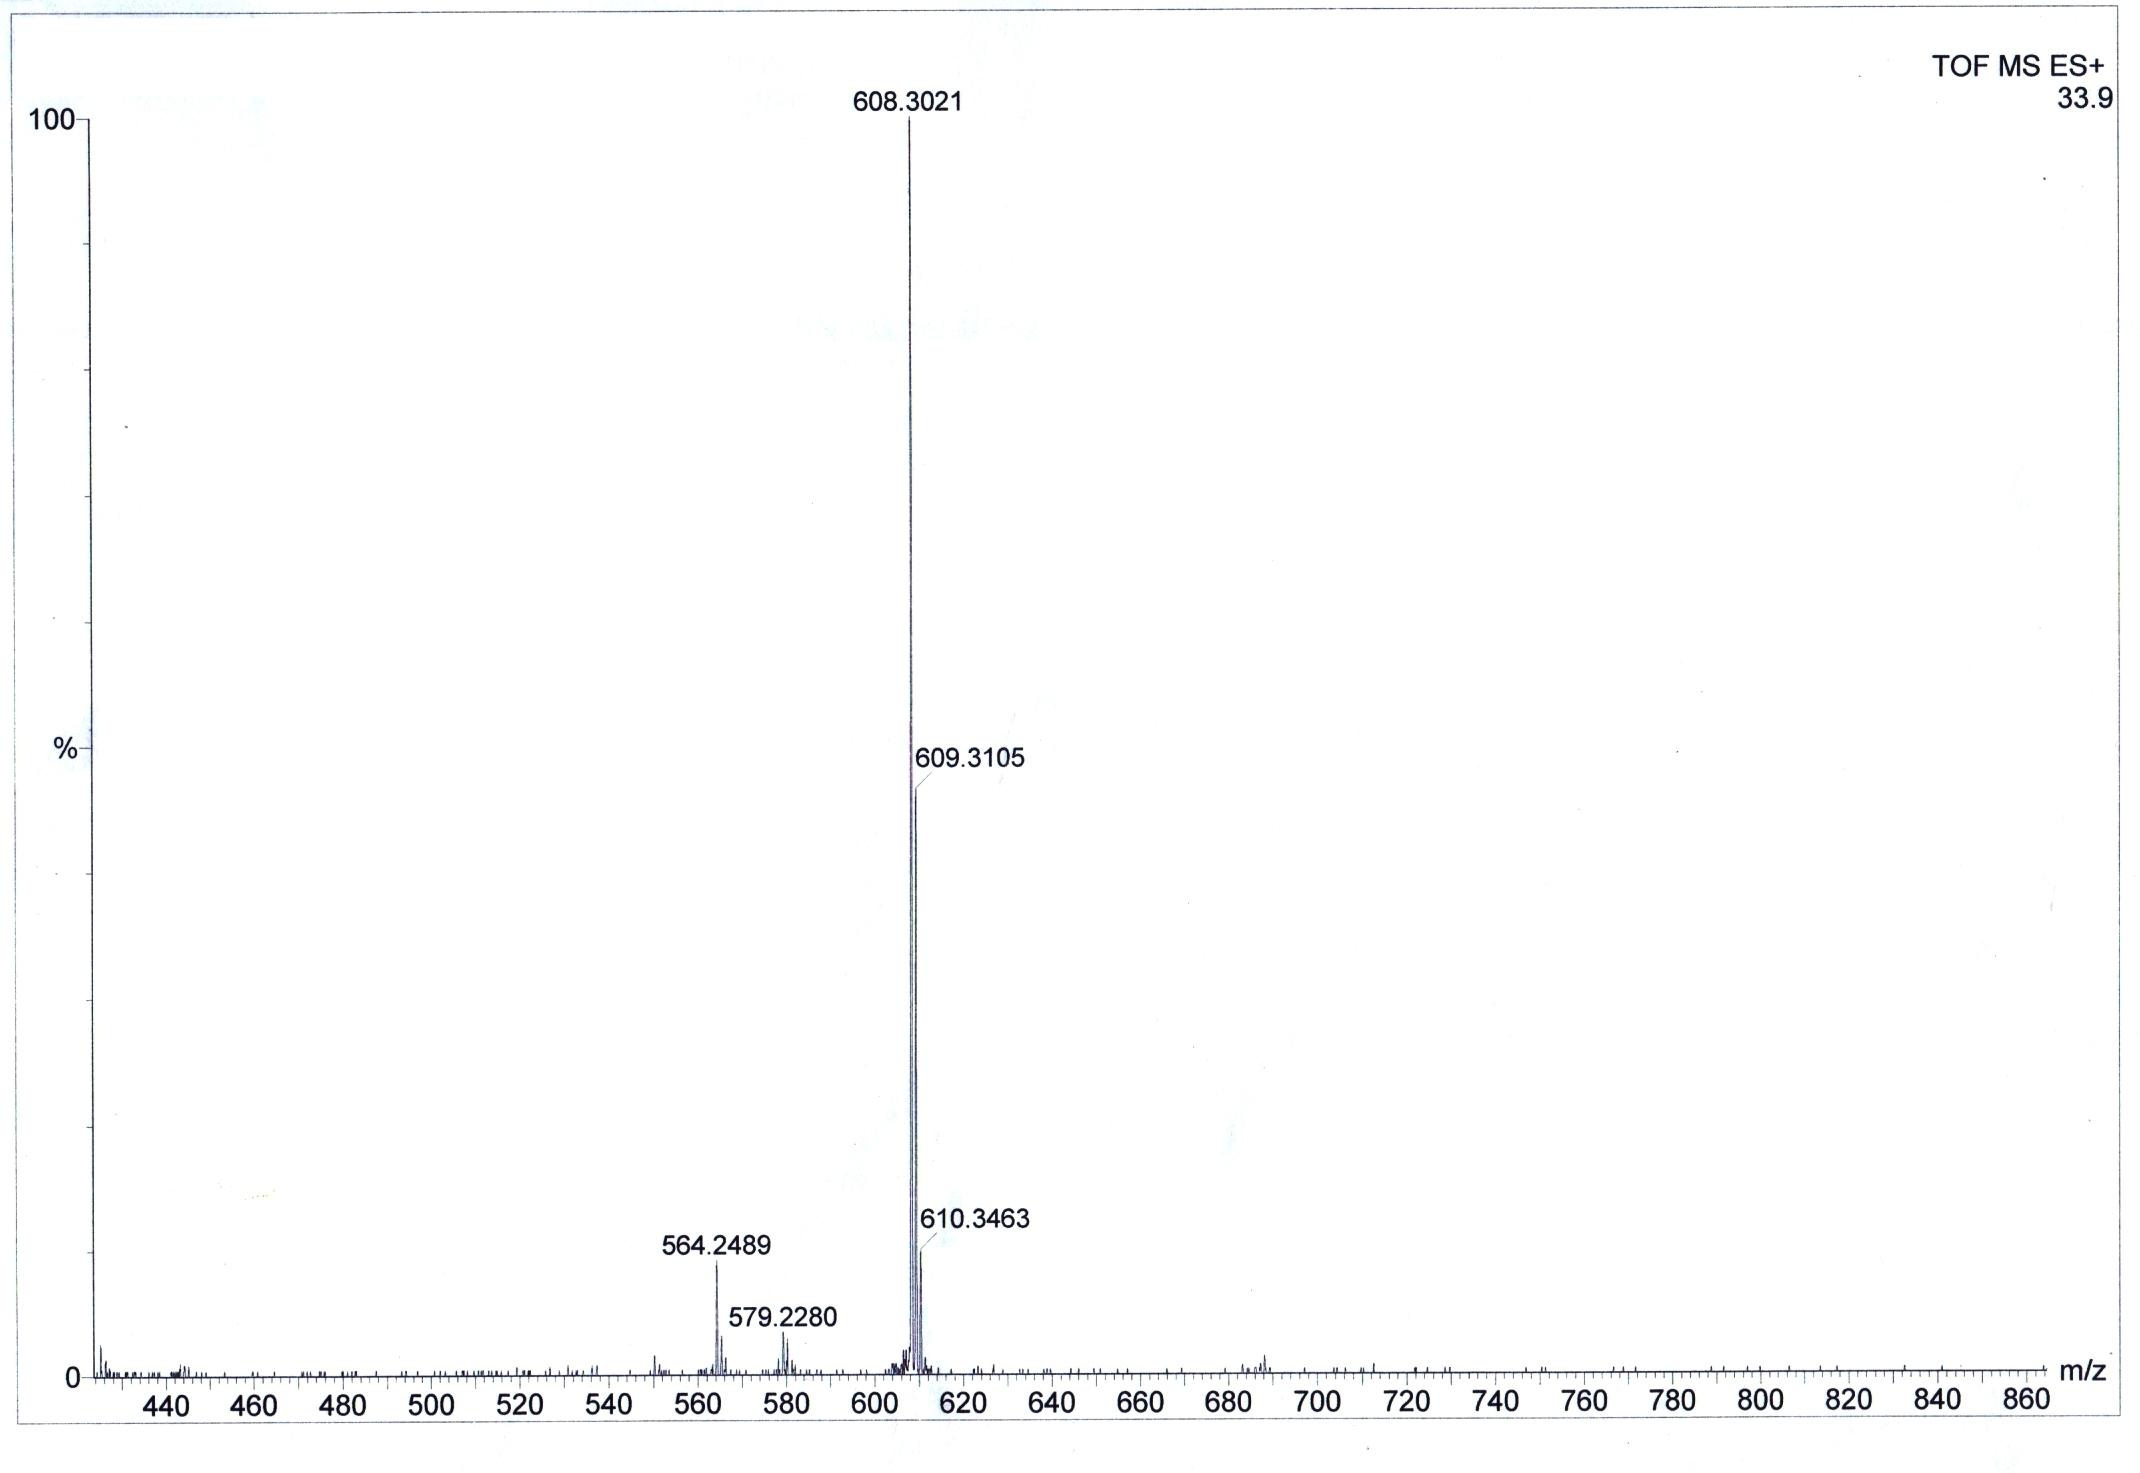

Supplement: Supplementary file 1 [file 15683666]
